# Supplementary material for: Therapy of uncomplicated falciparum malaria in Europe: MALTHER – a prospective observational multicentre study
Source: PubMed Central journal article supplement (PMC3477029; doi:10.1186/1475-2875-11-212), 2012-06-22
Supplement: 1475-2875-11-212-S1.pdf [file 1475-2875-11-212-S1.pdf]

Table 1: Main characteristics of 504 malaria patients in different European settings according to their treatment regimen

|                                             | Total           | AQ+PG <sup>1</sup> | MQ <sup>2</sup> | AR+LU <sup>3</sup> | QUI <sup>4</sup> | AR+MQ <sup>5</sup> | QUI+CL <sup>6</sup> | QUI+TC <sup>7</sup> | QUI+AQPG <sup>8</sup> | Other <sup>9</sup> |
|---------------------------------------------|-----------------|--------------------|-----------------|--------------------|------------------|--------------------|---------------------|---------------------|-----------------------|--------------------|
|                                             | N=504<br>(100%) | N=253<br>(50%)     | N=97<br>(19%)   | N=39<br>(8%)       | N=33<br>(6.5%)   | N=20<br>(4%)       | N=20<br>(4%)        | N=16<br>(3%)        | N= 15<br>(3%)         | N=11<br>(2%)       |
| Sex ratio*<br>(M/F)                         | 1.6             | 2                  | 2               | 1.1                | 0.4              | 1.2                | 1.5                 | 1.6                 | 2                     | 1.2                |
| Age median<br>(range)                       | 38<br>(18-79)   | 39<br>(18-71)      | 37<br>(18-72)   | 39<br>(20-69)      | 37<br>(18-69)    | 41<br>(25-79)      | 31<br>(19-65)       | 39<br>(18-69)       | 39<br>(19-67)         | 36<br>(20-62)      |
| Inpatient <sup>o</sup> %*<br>(N)            | 81.2<br>(409)   | 75.9<br>(192)      | 84.5<br>(82)    | 74.4<br>(29)       | 90.9<br>(30)     | 100<br>(20)        | 100<br>(20)         | 100<br>(16)         | 90.9<br>(30)          | 72.7<br>(8)        |
| Co-morbidity <sup>o</sup> %*<br>(N)         | 73.4<br>(370)   | 75.5<br>(191)      | 73.2<br>(71)    | 69.2<br>(27)       | 78.8<br>(26)     | 60<br>(12)         | 85<br>(17)          | 37.5<br>(6)         | 73.3<br>(11)          | 81.8<br>(9)        |
| Pre-travel advice <sup>o</sup> %*<br>(N)    | 27.4<br>(138)   | 32.8<br>(83)       | 13.4<br>(13)    | 33.3<br>(13)       | 45.5<br>(15)     | 5<br>(1)           | 50<br>(10)          | 0<br>(0)            | 13.3<br>(2)           | 9.1<br>(1)         |
| Chemoprophylaxis <sup>o</sup> %*<br>(N)     | 26.2<br>(132)   | 34.8<br>(88)       | 10.3<br>(10)    | 30.8<br>(12)       | 27.3<br>(9)      | 5<br>(1)           | 45<br>(9)           | 0<br>(0)            | 13.3<br>(2)           | 9.1<br>(1)         |
| Travel purpose %*(N)                        |                 |                    |                 |                    |                  |                    |                     |                     |                       |                    |
| • Tourism                                   | 10.9(55)        | 9.1(23)            | 9.3(9)          | 20.5(8)            | 12.1(4)          | 25(5)              | 10(2)               | 18.8(3)             | 0(0)                  | 9.1(1)             |
| • VFR**                                     | 69(348)         | 75.9(192)          | 68(66)          | 53.8(21)           | 66.7(22)         | 55(11)             | 60(12)              | 43.8(7)             | 66.7(10)              | 63.6(7)            |
| • Business                                  | 7.1(36)         | 7.1(18)            | 5.2(5)          | 7.7(3)             | 6.1(2)           | 5(1)               | 10(2)               | 18.8(3)             | 13.3(2)               | 0(0)               |
| • Humanitarian                              | 5.8(29)         | 3.6(9)             | 6.2(6)          | 10.3(4)            | 6.1(2)           | 10(2)              | 15(3)               | 0(0)                | 13.3(2)               | 9.1(1)             |
| • Other***                                  | 7(36)           | 4(11)              | 11(11)          | 7(3)               | 9(3)             | 5(1)               | 5(1)                | 18(3)               | 6(1)                  | 18(2)              |
| Region of infection <sup>o</sup> §<br>%*(N) |                 |                    |                 |                    |                  |                    |                     |                     |                       |                    |
| • West Africa                               | 59.5(300)       | 52.6(133)          | 80.4(78)        | 59(23)             | 36.4(12)         | 85(17)             | 40(8)               | 81.3(13)            | 53.3(8)               | 72.7(8)            |
| • Central Africa                            | 13.5(68)        | 15(38)             | 11.3(11)        | 20.5(8)            | 3(1)             | 10(2)              | 10(2)               | 12.5(2)             | 20(3)                 | 9.1(1)             |
| • East Africa                               | 18(3.6)         | 2(5)               | 6.2(6)          | 7.7(3)             | 6.1(2)           | 5(1)               | 0(0)                | 0(0)                | 0(0)                  | 9.1(1)             |
| • South Africa                              | 11(2.2)         | 0.8(2)             | 1(1)            | 7.7(3)             | 3(1)             | 0(0)               | 0(0)                | 6.3(1)              | 13.3(2)               | 9.1(1)             |
| • Madagascar and                            | 19(96)          | 26.5(67)           | 0(0)            | 5.1(2)             | 48.5(16)         | 0(0)               | 50(10)              | 0(0)                | 6.7(1)                | 0(0)               |

|                                                                            |                        |                        |                       |                         |                         |                          |                           |                          |                         |                        |
|----------------------------------------------------------------------------|------------------------|------------------------|-----------------------|-------------------------|-------------------------|--------------------------|---------------------------|--------------------------|-------------------------|------------------------|
| Comoro                                                                     | 0.6(3)                 | 0.4(1)                 | 0(0)                  | 0(0)                    | 3(1)                    | 0(0)                     | 0(0)                      | 0(0)                     | 6.7(1)                  | 0(0)                   |
| • Caribbean                                                                |                        |                        |                       |                         |                         |                          |                           |                          |                         |                        |
| • Indian sub-continent                                                     | 0.6(3)                 | 1.2(3)                 | 0(0)                  | 0(0)                    | 0(0)                    | 0(0)                     | 0(0)                      | 0(0)                     | 0(0)                    | 0(0)                   |
| • South East Asia                                                          | 0.8(4)                 | 1.6(4)                 | 0(0)                  | 0(0)                    | 0(0)                    | 0(0)                     | 0(0)                      | 0(0)                     | 0(0)                    | 0(0)                   |
| Travel duration, day median (min/max)                                      | 30<br>(4/>365)         | 30<br>(4/>365)         | 28<br>(7/>365)        | 29<br>(9/300)           | 45<br>(10/>365)         | 30<br>(15/335)           | 45<br>(9/130)             | 30<br>(14/365)           | 25<br>(7/300)           | 28<br>(7/360)          |
| Delay from symptoms to diagnosis <sup>°</sup> , day median (min/max)       | 3<br>(0/92)            | 3<br>(0/38)            | 3<br>(0/92)           | 2<br>(0/15)             | 5<br>(1/65)             | 3<br>(0/66)              | 5<br>(1/26)               | 5<br>(2/19)              | 4<br>(0/12)             | 3<br>(0/35)            |
| Temperature at diagnosis, °C median (min/max)                              | 39<br>(36/42)          | 39<br>(36/41)          | 39<br>(36/41)         | 39<br>(36/41)           | 39<br>(36/41)           | 39<br>(36/41)            | 39<br>(38/40)             | 38<br>(36/40)            | 39<br>(36/40)           | 39<br>(37/40)          |
| Parasite density at diagnosis <sup>°</sup> , per $\mu$ L median (min#/max) | 10,000<br>(0 /854,000) | 6,292<br>(48 /364,000) | 9,176<br>(1 /231,000) | 18,500<br>(48 /364,000) | 9,000<br>(400 /200,000) | 14,010<br>(968 /197,000) | 22,750<br>(1985 /854,000) | 40,000<br>(240 /218,400) | 16,000<br>(50 /245,000) | 22,000<br>(61 /71,100) |
| Country of treatment <sup>°</sup> %*(N)                                    |                        |                        |                       |                         |                         |                          |                           |                          |                         |                        |
| • Belgium                                                                  | 5.2(26)                | 2(5)                   | 0(0)                  | 0(0)                    | 6.1(2)                  | 0(0)                     | 5(1)                      | 87.5(14)                 | 26.7(4)                 | 0(0)                   |
| • France                                                                   | 53.4(269)              | 76.3(193)              | 1(1)                  | 51.3(20)                | 75.8(25)                | 0(0)                     | 95(19)                    | 0(0)                     | 73.3(11)                | 0(0)                   |
| • Germany                                                                  | 15.5(78)               | 11.9(30)               | 30.9(30)              | 38.5(15)                | 3(1)                    | 11.9(30)                 | 0(0)                      | 0(0)                     | 0(0)                    | 18.2(2)                |
| • Italy                                                                    | 24.6(124)              | 9.9(25)                | 68(66)                | 7.7(3)                  | 9.1(3)                  | 100(20)                  | 0(0)                      | 12.5(2)                  | 0(0)                    | 45.5(5)                |
| • United Kingdom                                                           | 1.4(7)                 | 0(0)                   | 0(0)                  | 2.6(1)                  | 6.1(2)                  | 0(0)                     | 0(0)                      | 0(0)                     | 0(0)                    | 36.4(4)                |

1. AQ+PG: atovaquone+proguanil (standard dosage according to the manufacturer); 2. MQ: mefloquine (standard dosage according to the manufacturer); 3. AR+LU: artemether+lumefantrine (standard dosage according to the manufacturer); 4. QUI: IV or oral quinine (24 mg/kg/d /7 days); 5. AR+MQ:  $\beta$ -artemether (300 mg loading dose at D0 + 100 mg/day until parasite-negative) + mefloquine (standard dosage); 6. QUI+CL: quinine (8 mg/kg/8 h for 3 days) + clindamycin (10 mg/kg/8h for 3 days); 7. QUI+TC: quinine (600 mg/8 h/d for 5-7 days) + tetracyclines (200 mg/d for 7 days); 8. QUI+AQPG: IV quinine (24 mg/kg/d for 1 or 2 days followed by 1 course of atovaquone+proguanil at standard dosage; used in case of vomiting due to malaria); 9. other: see text

<sup>°</sup>: significant heterogeneity among treatment groups at 5% alpha-level

\*: percentages are calculated relatively to each treatment group

\*\* : migrants visiting friends and relatives

\*\*\* : including recent immigration, students, soldiers

§ : one case reported as coming from North Africa not included in the table

# : thick film negative but with a positive dipstick or a positive Plasmodium falciparum serology with a typical history of malaria in a non-immune patient
